# Supplementary material for: β-glycyrrhetinic acid exerts an exfoliating effect on marginal gingivitis-inducing plaque biofilms
Source: Research Square preprint supplement (doi:10.21203/rs.3.rs-6615678/v1), 2025-06-03
Supplement: Supplementary file 1 [file 6c7a8c1eaac03b126bde7fe4.docx]

**Supporting Table**

Supporting Table 1　Test groups and test medium

| Reagent concentration in BHI medium | | | |
| --- | --- | --- | --- |
| Test group | BGA | CPC | DMSO (as control) |
| BGA | 0.0128% |  |  |
| CPC |  | 0.004% |  |
| DMSO | 5.000% | 5.000% | 5.000% |

BHI:Brain-Heart Infusion medium DMSO: dimethyl sulfoxide
